# Supplementary material for: Thermal Stability of Cpl-7 Endolysin from the Streptococcus pneumoniae Bacteriophage Cp-7; Cell Wall-Targeting of Its CW_7 Motifs
Source: PubMed Central journal article supplement (PMC3466307; doi:10.1371/journal.pone.0046654), 2012-10-08
Supplement: pone.0046654.s002.pdf [file pone.0046654.s002.pdf]

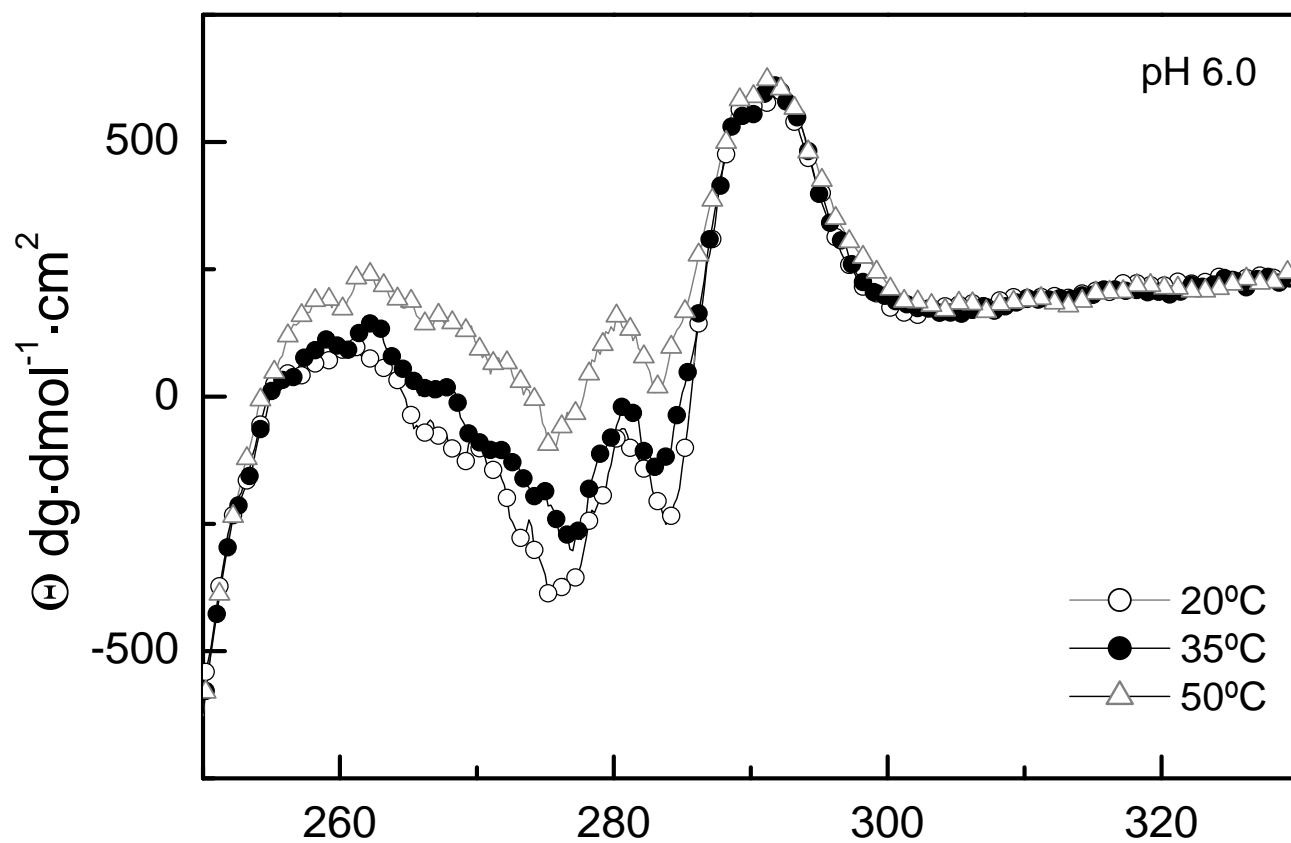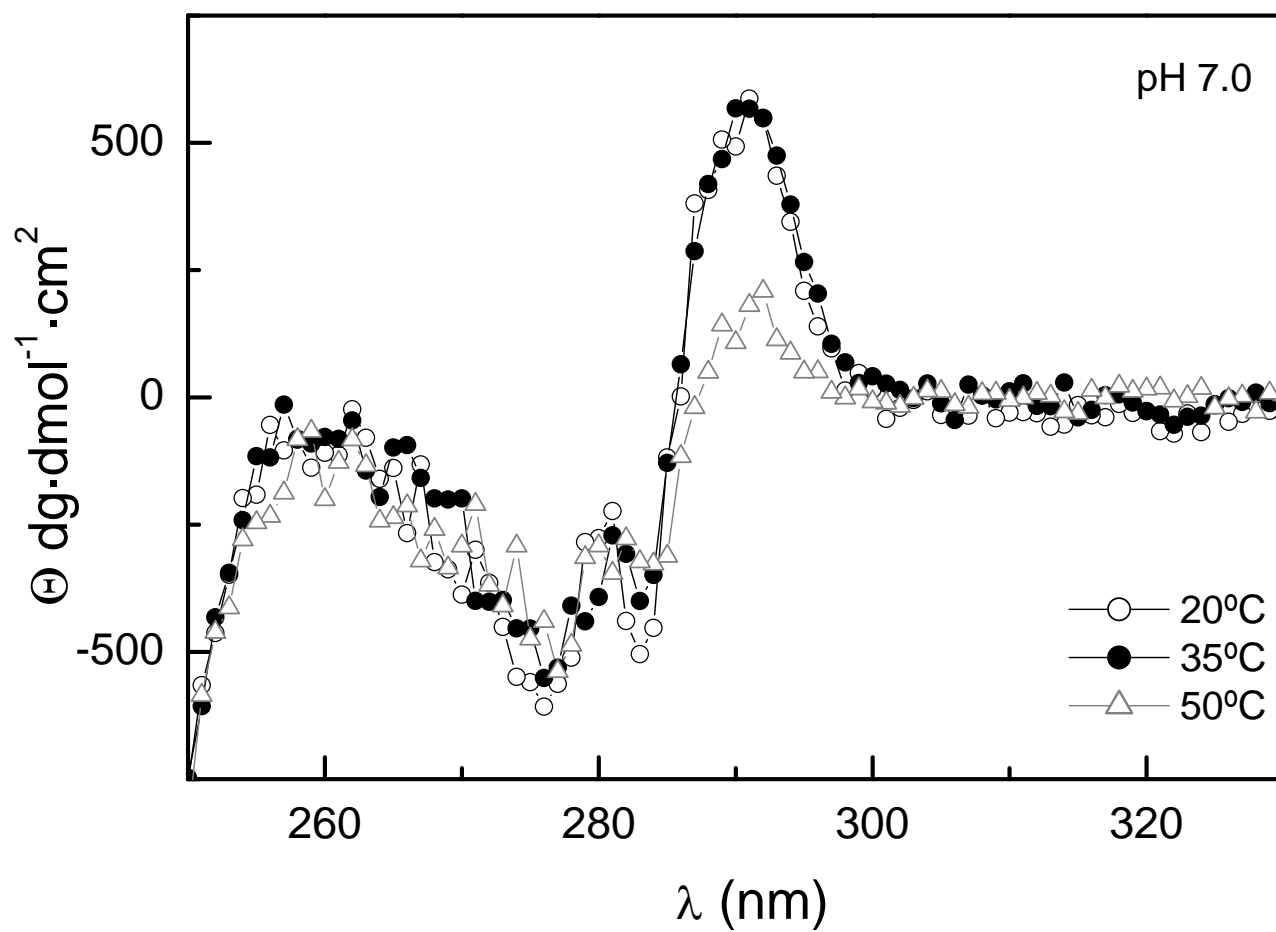

Supplementary Fig. S2
